# Supplementary material for: A Genetic System for Methanocaldococcus jannaschii: An Evolutionary Deeply Rooted Hyperthermophilic Methanarchaeon
Source: PubMed Central journal article supplement (PMC6616113; doi:10.3389/fmicb.2019.01256), 2019-07-03
Supplement: Data_Sheet_1.pdf [file Data_Sheet_1.pdf]

1 *Supplementary Materials*

2  
3 **A Genetic System for *Methanocaldococcus jannaschii*, an**  
4 **Evolutionary Deeply Rooted Hyperthermophilic Methanarchaeon**  
5  
6  
7

8 Dwi Susanti<sup>1</sup>, Mary C. Frazier<sup>1</sup>, Biswarup Mukhopadhyay<sup>1, 2, 3\*</sup>  
9

10  
11  
12  
13 <sup>1</sup>Department of Biochemistry, Virginia Tech, Blacksburg, VA, USA  
14

15 <sup>2</sup>Biocomplexity Institute, Virginia Tech, Blacksburg, VA, USA  
16

17 <sup>3</sup>Virginia Tech Carilion School of Medicine, Virginia Tech, Blacksburg, VA, USA  
18  
19  
20  
21  
22  
23  
24  
25  
26

27 **\*Correspondence:**

28 Biswarup Mukhopadhyay

29 [biswarup@vt.edu](mailto:biswarup@vt.edu)  
30  
31  
32  
33  
34

35 **Keywords: Genetics, ancient archaea, methanogen, hyperthermophile, anaerobe,**  
36 ***Methanocaldococcus jannaschii*, gene knock out, protein overexpression**  
37

38 **1 Supplementary Figure and Tables**

39

40 **1.1 Supplementary Figure**

**P<sub>Sta</sub>**

TAATATTCACCAAAATTAATATTTATTTTTGGTCTTTTTTAACATTATTCCTCATAGGTTTTATAAATTTCTACTA  
AATATTTGGATATATCAAAATTCGTTTTTAACCATTAAAAAAGTTGCAAATGTTTGAACTTTTTTATTTTAG  
AATTTGTCAAAAATTATATGATAAATTTGAAATATCAAAGATATAATAGAAATTCATATCGTAAAACTATTGTTA  
TAACCGTTTCAT**ATCGTAAGCTTTATATA**GTAGTTTCGTCGAAGGTATATACC**G**TCAATCAAATAACAACATA  
AAAACTT**AGGTGA**TAAGGT**ATC**  
+1

**P<sub>flaB1B2</sub>**

GTTTATCCATTAGTTTATATAAATTTGGATTTGTTTAAATTTATTTGGCATAATCATTACGTTAATTTGCTATTT  
AAGATTGACTATCGTTTTTACCTACACAAACCTCTACATAAACACCGATAAAATTGACTACGCAATAAATTA  
**CGCAAAAAGAATATATT**TTAAGAAAATTACAGTTTATAGT**G**AGGTGGATTGAGGAAAAGTGTGGGGGAAT  
TGTGTGGGGGAGGAAAATACTACAAGCAATTGAGGGATTAATATACTC**AGGTGA**TATGAGATGAAG**ATC**  
+1

**RBS**   **BRE/TATA Box**   **Start Codon**

41 **Figure S1. DNA sequences of promoters used in the study.** Promoter name, respective gene  
42 or operon: P<sub>sta</sub>, S-layer protein gene of *Methanocaldococcus* sp. FS406-22 (locus tag number,  
43 *mfs40622\_1341*); P<sub>flaB1B2</sub>, flagellin B1B2 operon of *Methanocaldococcus jannaschii* (locus tag  
44 number, *mj\_0891-2*). Indicated BRE/TATA box regions and the transcription start sites are either  
45 directly based on or inferred from published work with *M. jannaschii* (4, 5). +1, transcription start  
46 site.  
47

## Locus

### *flaB1B2*

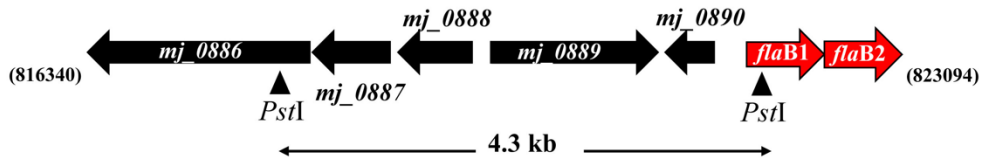

### *fprA*

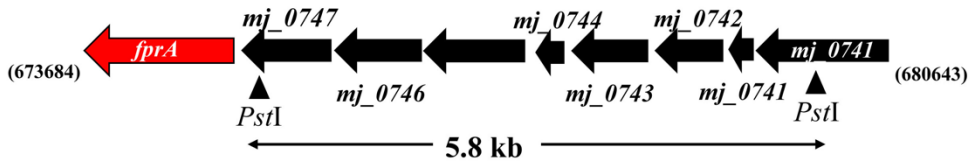

### *hmgA*

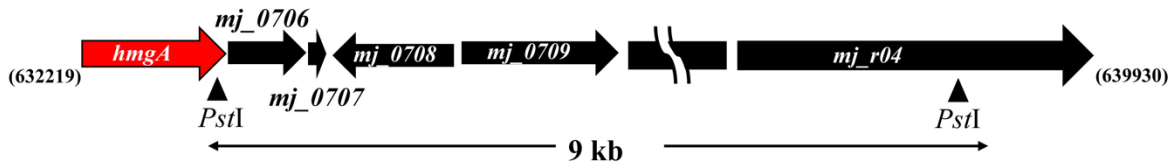

48 **Figure S2.** *PstI* restriction map for the select regions of *M. jannaschii* genome. This  
49 information was used to assign identities to the bands a-c in the Southern blot (Fig. 3C). The  
50 expected sizes of the fragments resulting from *PstI* digestion are shown. These fragments lack  
51 *SacI* restriction sites.

52

53

1 MDYKDHDGDY KDHD IDYKDD DDKGSAAWS HPQFEKGGGS GGSGGGWS  
 51 HPQFEKSGMK KYESRRSKIA DG~~VY~~WVGVLD WDIRMYHG~~YT~~ LKGT~~TY~~NAYL  
 101 VFGDEKVALI DNTYPG~~TSAQ~~ MWGR~~IKDA~~FE KEGREFKIDV IVQNHVEKDH  
 151 SGALPEI~~HKK~~ FPDAP~~IYCTE~~ VAVEGLK~~KHY~~ PSLKDAQ~~FKV~~ VHTGDTVDLG  
 201 GKT~~LT~~FLEAP LLHWPDS~~MFT~~ FYNEGGILFS NDAFGQ~~HLCF~~ PAHKRF~~DKDI~~  
 251 PEYVLMDANQ KFYANLITPL SKLVLK~~KFEE~~ VIQLGLLEKI KMIAPSHGQI  
 301 WTDPMKVIKA YQDFATG~~KAA~~ KDKAVIVYDT MHYSTQ~~KMAH~~ AFAEGLMSEG  
 351 IDVVMYFLHY DERSEIVKDI L~~DAKAV~~LFGI PTIYDEP~~PYS~~ IGDIIYYLRG  
 401 LKFNRTGF~~KR~~ LAVTFGSMGG EGGAVAKIAE DLAKCGFEVI NQYELYVPT  
 451 EDEL~~TNC~~YNM GKELAKRIKE MKIE

54

55 **Figure S3. Regions of FprA represented by the thermolysine peptides identified in MALDI**  
 56 **mass spectrometric analysis.** Red, areas covered in the analysis, respectively; underlined,  
 57 3xFLAG tag; underlined and italics, strep-tag. The sequence coverage in the analysis, 261/474 or  
 58 55%.

59

60 **1.2 Supplementary Tables**

61

62 **Table S1. Primers and synthetic DNA**

---

| Name               | DNA sequence (5' -> 3')                                                                                                                                                                    |
|--------------------|--------------------------------------------------------------------------------------------------------------------------------------------------------------------------------------------|
| Primer 1           | CTCAAAGGAATAATCCTCTG                                                                                                                                                                       |
| Primer 2           | GGAACATTCAGACCAGAAAG                                                                                                                                                                       |
| Primer 3           | GTGGTTTTAGCATACTATCTGG                                                                                                                                                                     |
| Primer 4           | GCATAAACTTCTGGTTTGC                                                                                                                                                                        |
| 3xFLAG-<br>2xSTREP | ATGGACTATAAGGATCACGATGGAGATTATAAAGATCATGATATTGATTATAA<br>GGATGACGATGATAAAGGATCAGCTGCTTCATGGTCACACCCACAATTTGAAA<br>AAGGAGGTGGATCAGGAGGTGGTTCTGGTGGAGGATCTTGGTCTCATCCACAA<br>TTCGAGAAGTCAGGA |

---

63

64

65 **Table S2. DNA sequences of coding regions, promoters, and a terminator**

| Sequence identity<br>(locus tag number) <sup>a</sup>              | DNA sequence (5' -> 3')                                                                                                                                                                                                                                                                                                                                                                                                                                                                                                                                                                                                                                                                                                                                                                                                                                                                                                                                                                                                                                                                                                                                                                                                                                                                                                                                              |
|-------------------------------------------------------------------|----------------------------------------------------------------------------------------------------------------------------------------------------------------------------------------------------------------------------------------------------------------------------------------------------------------------------------------------------------------------------------------------------------------------------------------------------------------------------------------------------------------------------------------------------------------------------------------------------------------------------------------------------------------------------------------------------------------------------------------------------------------------------------------------------------------------------------------------------------------------------------------------------------------------------------------------------------------------------------------------------------------------------------------------------------------------------------------------------------------------------------------------------------------------------------------------------------------------------------------------------------------------------------------------------------------------------------------------------------------------|
| <i>hmgA</i><br>( <i>mj_0705</i> )                                 | ATGGAAAATTATAATGACATCCTTGAAAAAATGTTAAATGGAGAAAATAAAGCCATATCAATTAG<br>ATAAAATGTTGGTTCAAAAATAGCAACTGAAATTAGAAGAAAATTTATGAAAAAAGGTGG<br>GATTGAATTTAAGCATATATGCAATTACTCAATAGATGAAGAAATGGCTATGAAGAAGATATA<br>GAAAATATGATTGGAGCTATACAGATTCATTGGGTTTTGCTGGGCCCTTAAAGATAAATGGGG<br>AATATGCAAGGGGAGAGTTTTACATCCCATTTGGCAACAACCTGAAGGAGCTTTGGTGGCATCGGT<br>TAATAGGGGTTGCTCAATAATAACAAAAATGTGGGGGGCAACTGTTAGGGTTATAGATGATAAG<br>ATGACAAGAGCCCCTTGCTTAAAAACAAGAGTGTGTAGATGCAATAAAAGTCAGAGATTGGA<br>TTAGAGAAAACCTTTGAGAGGATAAAGGAAGTTGCTGAATCAACAACAGGCATGGAAAGCTAAT<br>AAAGATAGAGCCAATTTAATCGTTGGAAAGAAATCTATATCCAAGATTTGTATTTAAAACCTGGA<br>GATGCCATGGGCATGAATATGGTTACAATTGCAACAGAGAGGCATGTAATTTTATAGAGGGGG<br>AATTAAAAAAAGAAGGCATATTTGTTAAAACAGTTGCTGTGAGTGGAAATGCATGTGTAGATAA<br>AAAGCCTAGTGGAAATGAACCTAATTAATGGTAGAGGAAATCTATTGTAGCAGAGGTATTTTA<br>ACTGAGAAGGAAGTTAATAAATACCTAAAACCCTTCCCAAGCTATAGCTGAAGTAAATAGGT<br>TAAAGAATTATATAGGTTTCAGCAATAAGCAATTCATGGGATTCAATGCCCATTTATGCAATAT<br>CATTGGGGCAATATTTCTTAGCTACTGGGCAAGATGAGGCACATATAGTTGAGGGTAGTTTAGGA<br>ATTACAATGGCTGAAGTTGAAGATGATGGATTATTTTTTCAGTAACTCTCCCAGATGTTCCCTA<br>TTGGGACTGTTGGAGGAGGAACAAGGGTTGAAACAAAAAGAGTGTCTAGAGATGCTTGGTTG<br>CTACGGAGATAAATAAGCTTTAAAATTTGCTGAAATTTGTTGAGCTGCAGTTTTAGCTGGGGAG<br>TTATCTTTATTAGGAGCTTTAGCAGCTGGACATTTAGGAAAAGCTCATCAAGAAGCTCGGTAGAT<br>AA                               |
| <i>fprA</i><br>( <i>mj_0748</i> )                                 | ATGAAAAATATGAAAGCAGACGCAGCAAAATAGCTGATGGTGTATATTTGGGTGGGGTTTTAG<br>ACTGGGACATAAGAATGTATCAGGCTACACATTAAGGAACAACATACAATGCCTATTTAGT<br>CTTTGGAGATGAAAAGTTGCTTTAATAGACAACATACCAGGAACCTCCGCTCAAATGTGG<br>GGGAGGATAAAAGATGCATTTGAAAAAGAGGGGAGGGAATTTAAAATGATGTAATCGTTCAAA<br>ACCACGTAGAAAAGACCACAGTGGAGCTCTCCCTGAAATACACAAAAAATTTCCAGATGCACC<br>AATATACTGTACTGAGGTAGCTGTTGAGGGACTTAAAAGCACTATCCATCATTAAAAGACGCT<br>CAATTTAAGGTTGTTTACATACAGGAGATACAGTTGATTTAGGAGGAAAGACATTAACATTTCTAG<br>AAGCTCCTCTATTACACTGGCCAGATAGTATGTTACCTTCTACAACGAAGGGGGAATTTTATT<br>CTCAAACGATGCATTTGGACAGCATCTCTGCTTCCCAGCACACAAGAGATTTGATAAAGATATT<br>CCAGAGTATGTGTTAATGGATGCAAACCAGAAGTTTATGCTAATTTAATTAATTCACCTCCATCA<br>AGCTTGTATTAAGAAAATTTGAGGAAGTTATTTCAGTTGGGATTATTTAGAAAAGATAAAAAATGAT<br>TGCCCCATCACACGGGCAGATATGGACAGACCCAATGAAAGTTATTAAGGCATATCAAGACTTT<br>GCTACTGGTAAAGCAGCTAAGGATAAAGCAGTTATCGTTTTATGATACATGCACTACTCAACAC<br>AAAAGATGGCTCATGCATTTGAGAGGGTTAATGAGTGAAGGAAATGATGTTGTAATGTATTT<br>CTTACACTACGATGAGAGAAGTGAATGTTAAAGACATCTTAGATGCTAAGGCAGTTCTCTTT<br>GGAATTTCCAACAATCTATGATGACCATATCCATCAATTTGGAGATATCATATACTACTTGAAG<br>GATTGAAATTTAACAGAACAGGATTTAAGAGATTGGCGGTTACTTTTGGTTCAATGGGGGAGAG<br>AGGTGGAGCAGTTGCTAAGATTGCTGAAGACTTGGCGAAATGTGGATTTGAAGTTATTAATCAA<br>TATGAAGCTACTATGTCCTAACAGAGGATGAATTAACAACCTGCTACAATATGGGTAAAGAAAT<br>TGGCTAAGAGAATTAAGAGATGAAGATTGAATGA |
| <i>P<sub>sla</sub></i><br>( <i>MFS40622_1341</i> for <i>sla</i> ) | AAATATTCACAAAATTAATATTTATTTTTGGTCTTTTTTAAACATTATTCCTCATAGGTTTTAT<br>AAATTTCTACTAAATATTTGGATATATCAAAATTCGTTTTTAAACCATTTAAAAAAGTTGCAAAAT<br>GTTTGTAATTTTTATTTTAGAATTTGTCAAAAATTTATATGATAAATTTGAAATATCAAAGAT<br>ATAATAGAAATTCATATCGTAAAACCTATTTGTTATAACCGTTTCATATCGTAAGCTTTATATAGT<br>AGTTTCGTCGAAGGTATATACCGTCAATCAAATAACAACATAA                                                                                                                                                                                                                                                                                                                                                                                                                                                                                                                                                                                                                                                                                                                                                                                                                                                                                                                                                                                                                                       |
| <i>P<sub>flaB1</sub></i><br>( <i>mj_0891</i> for <i>flaB1</i> )   | GTTTATCCATTAGTTTATATAAATTTGGATTTGTTTAAATTTATTTGGCATAATCATTACGTTA<br>ATTTGCTATTTAAGATTGACTATCGTTTTTACCTACACAACCTCTACATAAACACCGATAAAA<br>TTGACTACGCAATAAATACGCAAAAAGAATATATTTTAAAGAAAATTACAGTTTATAGTGAGGT<br>GGATTGAGGAAAGTGTGGGGGAATTTGTTGGGGGAGGAAAACTACTACAAGCAATTTGAGGGATTA<br>ATATACTCAGGTGATATGAGATGAAG                                                                                                                                                                                                                                                                                                                                                                                                                                                                                                                                                                                                                                                                                                                                                                                                                                                                                                                                                                                                                                                          |
| <i>T<sub>sla</sub></i><br>( <i>MFS40622_1341</i> for <i>sla</i> ) | ATCCTCTAAATCTTTTTTTATTTTTTTAGATGAC                                                                                                                                                                                                                                                                                                                                                                                                                                                                                                                                                                                                                                                                                                                                                                                                                                                                                                                                                                                                                                                                                                                                                                                                                                                                                                                                   |

66 <sup>a</sup> P, promoter; T, terminator; *hmgA*, *fprA*, *sla*, and *flaB1*, genes for HMG CoA reductase, F<sub>420</sub>H<sub>2</sub> oxidase,  
67 S-layer protein, and flagellin, respectively.

68  
69

70

71

## REFERENCES

72

73 1. **Johnson EF, Mukhopadhyay B.** 2005. A new type of sulfite reductase, a novel coenzyme  
74 F<sub>420</sub>-dependent enzyme, from the methanarchaeon *Methanocaldococcus jannaschii*. J Biol  
75 Chem **280**:38776-38786.

76 2. **Mukhopadhyay B, Johnson EF, Wolfe RS.** 1999. Reactor-scale cultivation of the  
77 hyperthermophilic methanarchaeon *Methanococcus jannaschii* to high cell densities. Appl  
78 Environ Microbiol **65**:5059-5065.

79 3. **Balch WE, Wolfe RS.** 1976. New approach to the cultivation of methanogenic bacteria:  
80 2-mercaptoethanesulfonic acid (HS-CoM)-dependent growth of *Methanobacterium*  
81 *ruminantium* in a pressureized atmosphere. Appl Environ Microbiol **32**:781-791.

82 4. **Zhang J, Li E, Olsen GJ.** 2009. Protein-coding gene promoters in *Methanocaldococcus*  
83 (*Methanococcus*) *jannaschii*. Nucleic Acids Res **37**:3588-3601.

84 5. **Smollett K, Blombach F, Reichelt R, Thomm M, Werner F.** 2017. A global analysis of  
85 transcription reveals two modes of Spt4/5 recruitment to archaeal RNA polymerase. Nat  
86 Microbiol **2**:17021.

87
